# Supplementary material for: A global climatology of sting-jet extratropical cyclones
Source: Copernicus journal article supplement (doi:10.5194/wcd-5-1523-2024), 2024-12-17
Supplement: Supplementary file 1 [file wcd-5-1523-2024-supplement.pdf]

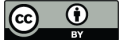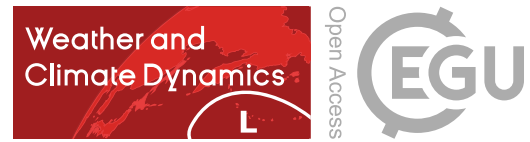

*Supplement of*

## **A global climatology of sting-jet extratropical cyclones**

**Suzanne L. Gray et al.**

*Correspondence to:* Suzanne L. Gray ([s.l.gray@reading.ac.uk](mailto:s.l.gray@reading.ac.uk))

The copyright of individual parts of the supplement might differ from the article licence.

## S1 Additional composite cyclone maps

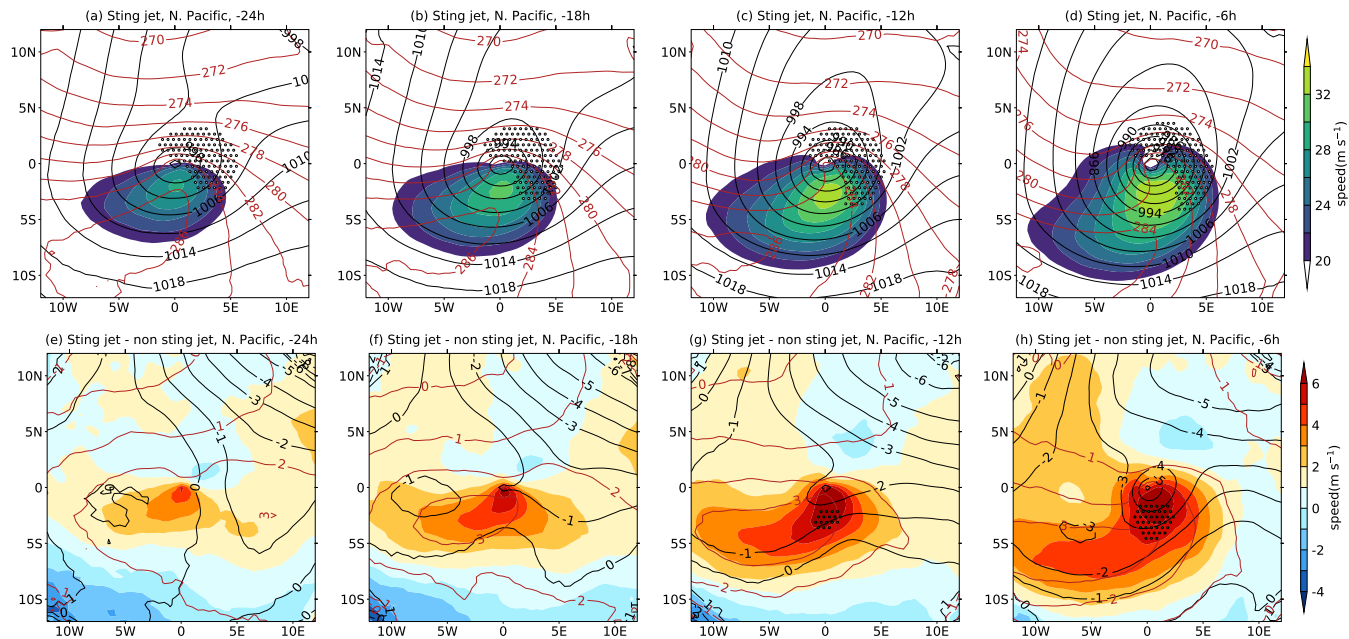

**Figure S1.** As for Fig. 9 but for the North Pacific.

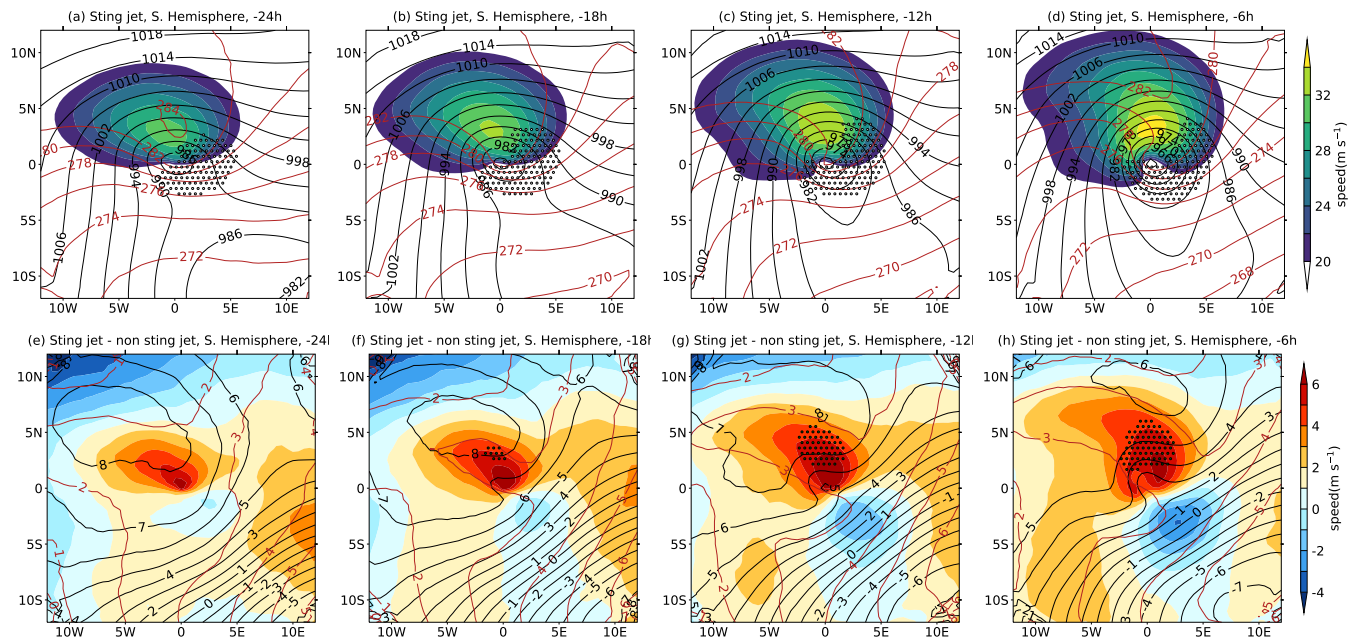

**Figure S2.** As for Fig. 9 but for the Southern Hemisphere.

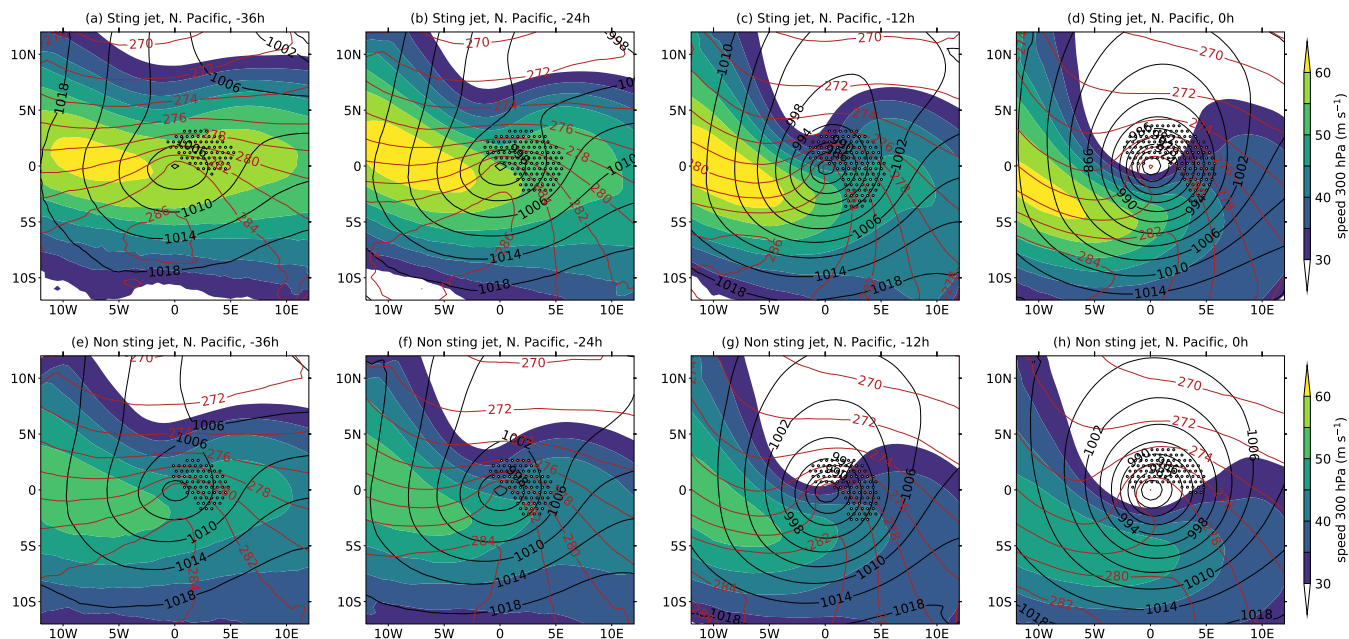

**Figure S3.** As for Fig. 10 but for the North Pacific.

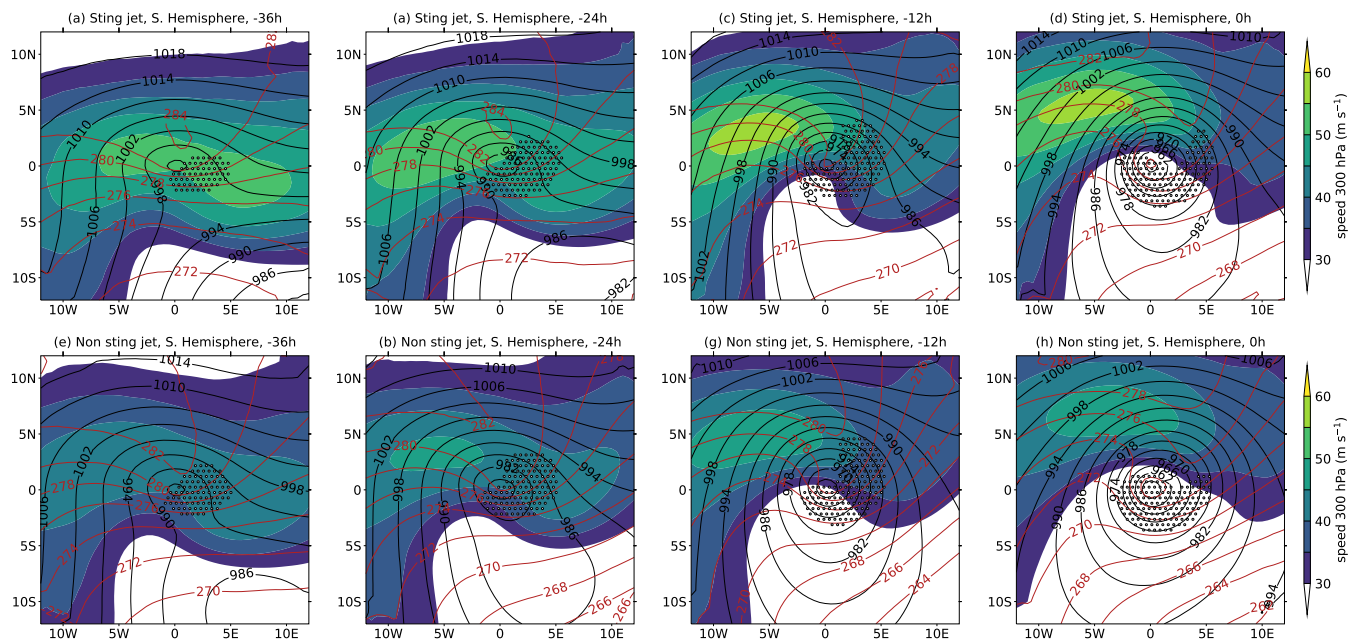

**Figure S4.** As for Fig. 10 but for the Southern Hemisphere.

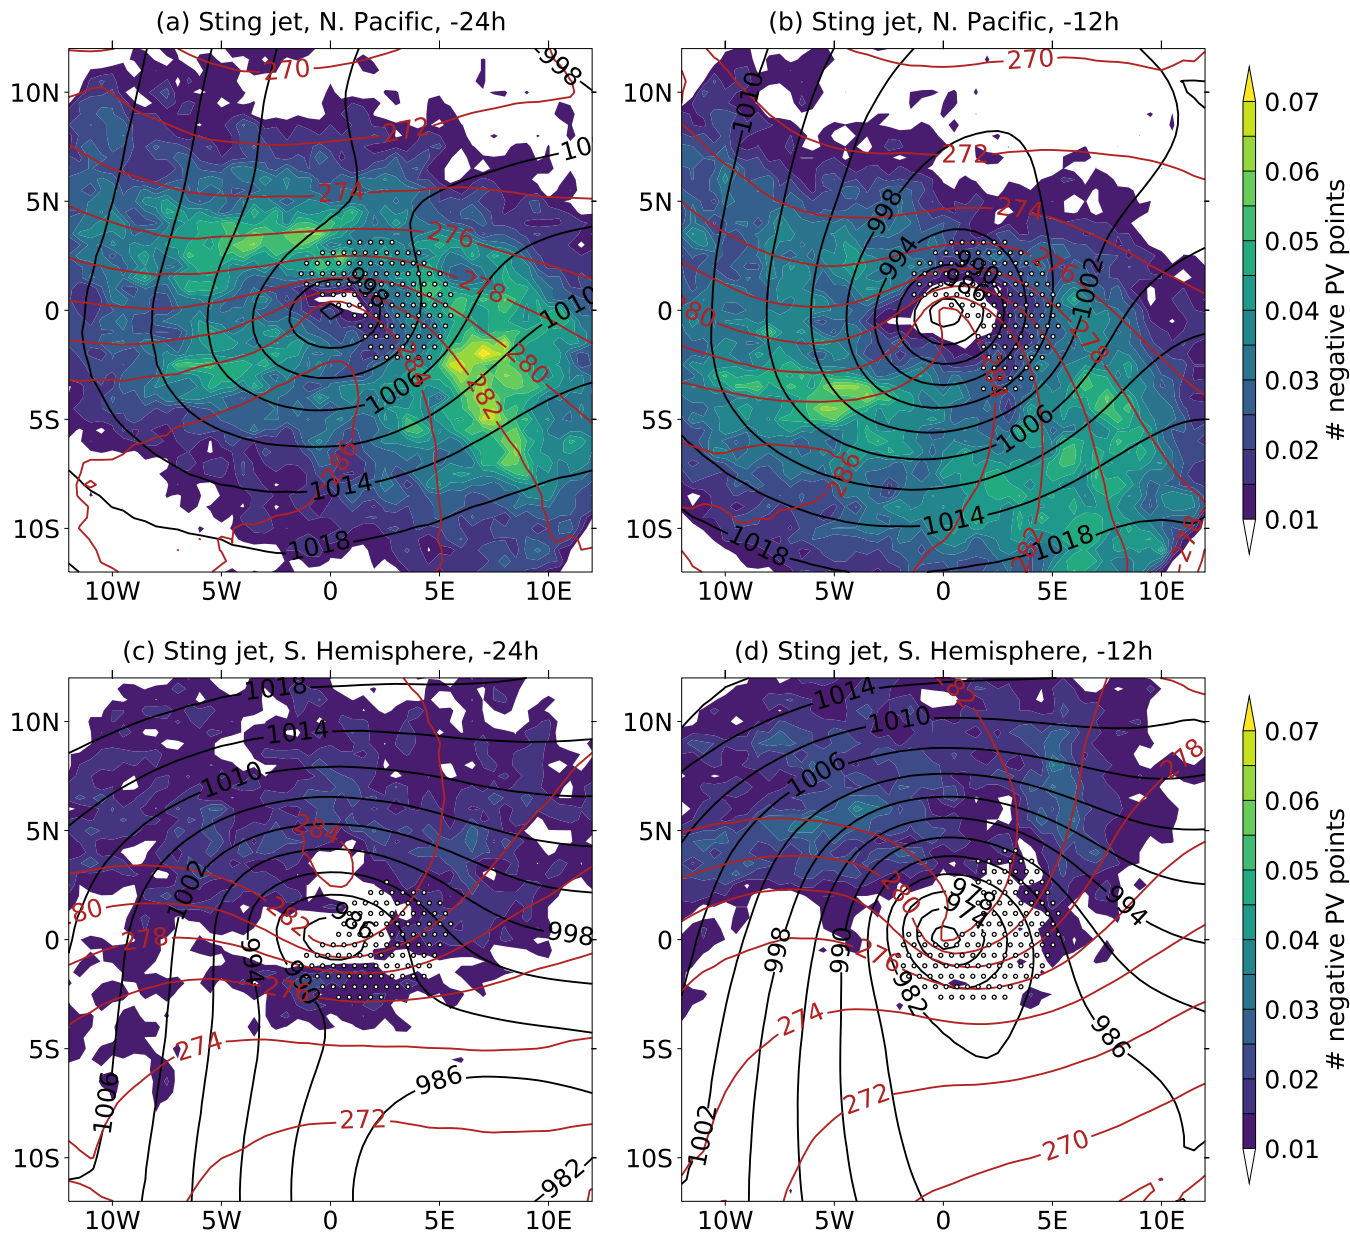

**Figure S5.** Maps of the composite 700-hPa symmetrically unstable PV structure of the sting-jet cyclones in the North Pacific (top row) and Southern Hemisphere (bottom row) at (a,c) -24 and (b,d) -12 h prior to the time of maximum intensity. Fields as in Fig. 11(a). Note that these PV points are negatively and positively signed for the North Pacific and Southern Hemisphere basins, respectively. Recall that in the Southern Hemisphere composites the cloud head tip is to the southwest of the composite centre and the cold front is ahead of this in a clockwise direction).

## S2 Notable storms

As described in the main text, a set of 33 "notable storms" was used to test and refine the algorithm before applying it to the complete cyclone datasets. For each of these storms an "expert judgment" was made as to the likelihood that it contained a sting jet. Where present, satellite imagery and ocean surface wind data (see details in Sect. 2.3 of the main text), together with published results where available, were analysed. Output from the SJP diagnostic (Sect. 3.2) was also examined qualitatively, focusing on the relative locations of cloud head sector and CSI points, the direction of travel of the storms and the number of CSI points present (using map-style plots such as those in Fig. 3 in the main text). All these data were used to form an expert judgement (on a five-point scale: TRUE, LIKELY TRUE, MARGINAL, LIKELY FALSE, FALSE) of the likelihood of sting jet presence (see scores and brief score justifications in Table S2). This manual evaluation of the storm likelihood to contain a sting jet was then compared against the automatic SJP score (TRUE, MARGINAL or FALSE). There was satisfactory agreement between the two sets of scores as they were equivalent or near-to-equivalent (such that the manual and SJP assessments were, respectively, TRUE-TRUE, LIKELY TRUE-TRUE, MARGINAL-MARGINAL, LIKELY FALSE-FALSE, or FALSE-FALSE) in 22 cases out of 33, while 9 of the remaining 11 involved a MARGINAL score in one of the two sets, indicating that either the manually analysed evidence was not clear enough for a conclusive verdict or that the results from the precursor algorithm did not give a clear indication. The only two cases of clear disagreement (storm Martin and the October 2021 Nor'easter storm, both matched as LIKELY FALSE-TRUE) are associated with a lack of clear satellite imagery and a cyclone with a complex track, respectively, and are thus cases where considerable uncertainty applies to either the manual or automatic classifications. Note that the large fraction of TRUE cyclones, 22 according to the SJP diagnostic compared to 6 classified as FALSE and 5 as MARGINAL, does not indicate that the results of the algorithm are skewed towards TRUE, as several of the notable storms are known or hypothesised sting-jet cyclones (with at least seven of them documented as such in the literature). Details of the storms and a comparison between the expert judgement and SJP algorithm determined SJP likelihood scores are given in Tables S1 and S2, respectively.

Table S1: List of notable storms used for the evaluation of the SJP diagnostic, together with their regional location, time of maximum intensity, status of sting jet documentation and availability of observation for our manual expert judgement. In the "Sat. imagery" column, the letters indicate the scatterometer data and the different sources of satellite imagery (C: CCMP3.0; S: SEVIRI; A: AVHRR; I: IR Ring, see Sect. 2.3). Note that storms Daria, Martin, Klaus, Kyrill and Friedhelm were also considered by Hewson and Neu (2015) with the conclusion that the likely cause(s) of the strongest gusts over land did not include a sting jet, but the possibility of sting jets prior to landfall were not considered.

| Beginning of Table       |                          |                    |                                                                                             |              |
|--------------------------|--------------------------|--------------------|---------------------------------------------------------------------------------------------|--------------|
| Region                   | Storm name               | Max intensity time | Documented SJ                                                                               | Sat. imagery |
| N. Atl.–W. Europe        | Great Storm              | 16 Oct 1987 00UTC  | Yes: Browning (2004); Browning and Field (2004); Clark et al. (2005); Hewson and Neu (2015) | none         |
| N. Atl.–W. Europe        | Daria (Burns' Day)       | 25 Jan 1990 18UTC  | N/A                                                                                         | none         |
| N. Atl.–W. Europe        | Braer Storm              | 08 Jan 1993 06UTC  | N/A                                                                                         | C            |
| N. Atl.–W. Europe        | Lothar                   | 26 Dec 1999 06UTC  | Possible: Hewson and Neu (2015)                                                             | C            |
| N. Atl.–W. Europe        | Martin                   | 27 Dec 1999 18UTC  | N/A                                                                                         | C            |
| N. Atl.–W. Europe        | Kyrill                   | 17 Jan 2007 18UTC  | N/A                                                                                         | C, H         |
| N. Atl.–W. Europe        | Klaus                    | 24 Jan 2009 00UTC  | N/A                                                                                         | C, S, A      |
| N. Atl.–W. Europe        | Friedhelm                | 08 Dec 2011 12UTC  | Yes: Martínez-Alvarado et al. (2014); Baker et al. (2014)                                   | C, S, A      |
| N. Atl.–W. Europe        | Tini                     | 12 Feb 2014 12UTC  | Yes: Volonté et al. (2018)                                                                  | C, S, A      |
| N. Atl.–W. Europe        | ex-TC Ophelia            | 16 Oct 2017 06UTC  | N/A                                                                                         | C, S, A      |
| N. Atl.–W. Europe        | Arwen                    | 26 Nov 2021 18UTC  | N/A                                                                                         | C, S, A, I   |
| N. Atl.–W. Europe        | Barra                    | 07 Dec 2021 12UTC  | N/A                                                                                         | C, S, A, I   |
| N. Atl.–W. Europe        | Corrie                   | 30 Jan 2022 00UTC  | N/A                                                                                         | C, S, A, I   |
| N. Atl.–W. Europe        | Eunice                   | 18 Feb 2022 06UTC  | Yes: Volonté et al. (2023a, b)                                                              | C, S, A, I   |
| Med. and Black Seas      | Black Sea cyclone        | 03 Dec 2012 12UTC  | Yes: Brâncuș et al. (2019)                                                                  | C, S, A      |
| N. Atl.–N. USA E. coast  | Eastern N. USA cyclone   | 06 Feb 1988 00UTC  | N/A                                                                                         | none         |
| N. Atl.–N. USA E. coast  | ERICA cyclone #1         | 21 Nov 1988 12UTC  | N/A                                                                                         | none         |
| N. Atl.–N. USA E. coast  | ERICA cyclone #2         | 13 Dec 1988 06UTC  | N/A                                                                                         | none         |
| N. Atl.–N. USA E. coast  | N. USA Blizzard #1       | 09 Feb 2013 06UTC  | N/A                                                                                         | C, S, A      |
| N. Atl.–N. USA E. coast  | N. USA Blizzard #2       | 05 Jan 2018 00UTC  | N/A                                                                                         | C, S, A      |
| N. Atl.–N. USA E. coast  | Nor'easter               | 27 Oct 2021 06UTC  | N/A                                                                                         | C, S, A, I   |
| N. Pac. –N. USA W. coast | Hanukkah Eve Windstorm   | 15 Dec 2006 00UTC  | No: Mass and Dotson (2010)                                                                  | C            |
| N. Pac. –N. USA W. coast | Great Coastal Gale       | 02 Dec 2007 06UTC  | N/A                                                                                         | C            |
| N. Pac. –N. USA W. coast | N. Pacific cyclone #1    | 15 Dec 2011 06UTC  | Yes: Parker (2013)                                                                          | C, A         |
| N. Pac. –N. USA W. coast | N. Pacific cyclone #2    | 12 Jan 2012 12UTC  | Yes: Parker (2013)                                                                          | C, A         |
| N. Pac. –N. USA W. coast | N. Pacific cyclone #3    | 15 Jan 2013 06 UTC | N/A                                                                                         | C, A         |
| N. Pac. –N. USA W. coast | ex-TC Nuri               | 08 Nov 2014 00UTC  | N/A                                                                                         | C, A         |
| N. Pac. –N. USA W. coast | Alaskan cyclone          | 08 Dec 2018 00UTC  | N/A                                                                                         | C, A         |
| N. Pac. –N. USA W. coast | NE Pacific Bomb          | 24 Oct 2021 12UTC  | N/A                                                                                         | C, A, I      |
| S Hemisphere             | Antarctic Bomb           | 13 Aug 2021 00UTC  | N/A                                                                                         | C, S, A, I   |
| S Hemisphere             | S. Hemisphere cyclone #1 | 02 Jun 2021 00UTC  | N/A                                                                                         | C, S, A      |

| Continuation of Table |                          |                    |               |              |
|-----------------------|--------------------------|--------------------|---------------|--------------|
| Region                | Storm name               | Max intensity time | Documented SJ | Sat. imagery |
| S Hemisphere          | S. Hemisphere cyclone #2 | 19 Jul 2021 12UTC  | N/A           | C, S, A, I   |
| S Hemisphere          | S. Hemisphere cyclone #3 | 21 Aug 2021 00UTC  | N/A           | C, S, A, I   |
| End of Table          |                          |                    |               |              |



Table S2: List of notable storms used for the evaluation of the SJP diagnostic, together with a one-line summary of our manual expert judgement and manual and automatic scores.

| Beginning of Table             |                                                                                                                                                                                |                        |                 |
|--------------------------------|--------------------------------------------------------------------------------------------------------------------------------------------------------------------------------|------------------------|-----------------|
| Storm name                     | Expert judgement                                                                                                                                                               | Expert judgement score | Algorithm score |
| Great Storm Daria (Burns' Day) | Precursors consistent with literature.<br>CSI points in the right place at plausible time, satellite imagery needed for confirmation.                                          | TRUE<br>LIKELY TRUE    | TRUE<br>TRUE    |
| Braer Storm                    | No clear scatterometer SJ evidence but there are CSI hints, clear satellite imagery would have helped.                                                                         | MARGINAL               | TRUE            |
| Lothar                         | Difficult task, lack of clear satellite imagery, uncommon cyclone structure and unclear SJ indications.                                                                        | MARGINAL               | TRUE            |
| Martin                         | Strong scatterometer winds probably due to CCB rather than SJ, clear satellite imagery would have helped.                                                                      | LIKELY FALSE           | TRUE            |
| Kyrill                         | Contradicting signals between CSI, scatterometer and satellite imagery (cloud head). Strong winds probably not SJ.                                                             | LIKELY FALSE           | FALSE           |
| Klaus<br>Friedhelm             | Good indications of likely SJ presence from all tools.<br>Satellite imagery, scatterometer winds, precursors all pointing towards likely SJ presence, confirmed by literature. | LIKELY TRUE<br>TRUE    | TRUE<br>TRUE    |
| Tini                           | Agreement between observations and literature evidence and precursor tool, but short-lived CSI signal.                                                                         | TRUE                   | TRUE            |
| ex-TC Ophelia                  | Contrast between lack of SJ indications in satellite imagery and scatterometer winds, and abundance of cloud-head-tip CSI.                                                     | MARGINAL               | TRUE            |
| Arwen                          | Weak evidence in satellite imagery, scatterometer winds and CSI points but (early?) presence of SJ cannot be ruled out.                                                        | MARGINAL               | MARGINAL        |
| Barra                          | No clear SJ hint in scatterometer winds but both satellite imagery and CSI points indicate likely cloud-head slantwise motions.                                                | LIKELY TRUE            | TRUE            |
| Corrie                         | Difficult analysis due to storm location and terrain, no clear SJ evidence but it cannot be totally ruled out.                                                                 | LIKELY FALSE           | FALSE           |
| Eunice                         | Less CSI than expected from literature (documented SJ) and satellite imagery and scatterometer winds, possibly due to compact structure.                                       | TRUE                   | TRUE            |
| Black Sea cyclone              | Satellite imagery, scatterometer winds and precursors are both consistent with the literature in indicating early SJ descent.                                                  | TRUE                   | MARGINAL        |
| Eastern N. USA cyclone         | No satellite imagery, but CSI points in right place several times, possibly suggesting unreleased CSI (in ERA5).                                                               | LIKELY TRUE            | TRUE            |
| ERICA cyclone #1               | No satellite imagery, but CSI points are in the right place, mainly in mature stages (unreleased as above?)                                                                    | MARGINAL               | MARGINAL        |
| ERICA cyclone #2               | No satellite imagery and no relevant CSI points.                                                                                                                               | LIKELY FALSE           | FALSE           |
| N. USA Blizzard #1             | Indications of SJ development from satellite imagery and CSI points, coherent with later wind maximum in frontal fracture.                                                     | LIKELY TRUE            | MARGINAL        |



## Continuation of Table

| Storm name               | Expert judgement                                                                                                              | Expert judgement score | Algorithm score |
|--------------------------|-------------------------------------------------------------------------------------------------------------------------------|------------------------|-----------------|
| N. USA Blizzard #2       | Possible very early SJ development, outside precursor window, and mature stage CSI. Complex track.                            | MARGINAL               | TRUE            |
| Nor'easter               | Tricky task due to complex track. Weak SJ signals and cyclone structure not conducive to its development.                     | LIKELY FALSE           | TRUE            |
| Hanukkah Eve Wind-storm  | Typical SJ cyclone structure. Limited CSI but in the right place. SJ dismissal in published literature seems questionable.    | MARGINAL               | FALSE           |
| Great Coastal Gale       | Strongly positive CSI indication but lack of conclusive satellite imagery.                                                    | LIKELY TRUE            | TRUE            |
| N. Pacific cyclone #1    | Documented SJ case, early banding and cloud-head tip CSI but most CSI is at late stages (unreleased?).                        | TRUE                   | TRUE            |
| N. Pacific cyclone #2    | Documented SJ case, signals from both satellite imagery and CSI (times not fully consistent), scatterometer winds less clear. | TRUE                   | TRUE            |
| N. Pacific cyclone #3    | Possible very early SJ development, outside precursor window. Widespread late CSI in right areas.                             | MARGINAL               | TRUE            |
| ex-TC Nuri               | Sustained CSI in right areas but affected by odd track. SJ hints, weak from scatterometer winds. Frontal fracture not clear.  | MARGINAL               | MARGINAL        |
| Alaskan cyclone          | Weak signals from observations in good agreement with the (again, not strong) CSI signal.                                     | LIKELY TRUE            | TRUE            |
| NE Pacific Bomb          | Hints of early SJ descent from scatterometer winds and (more clearly) CSI, despite lack of clear satellite imagery evidence.  | LIKELY TRUE            | TRUE            |
| Antarctic Bomb           | Hints of possible SJ presence from satellite imagery and scatterometer winds but absence of CSI in correct region.            | MARGINAL               | FALSE           |
| S. Hemisphere cyclone #1 | All sources point at possible SJ development before maximum intensity.                                                        | LIKELY TRUE            | TRUE            |
| S. Hemisphere cyclone #2 | Absence of any clear evidence of SJ descent.                                                                                  | LIKELY FALSE           | FALSE           |
| S. Hemisphere cyclone #3 | No prior literature/analysis but multiple evidence of likely SJ presence.                                                     | LIKELY TRUE            | TRUE            |

End of Table

## References

- 25 Baker, L. H., Gray, S. L., and Clark, P. A.: Idealised simulations of sting-jet cyclones, *Q. J. Roy. Meteorol. Soc.*, 140, 96–110, <https://doi.org/10.1002/QJ.2131>, 2014.
- Browning, K. A.: The sting at the end of the tail: Damaging winds associated with extratropical cyclones, *Q. J. Roy. Meteorol. Soc.*, 130, 375–399, <https://doi.org/10.1256/qj.02.143>, 2004.
- Browning, K. A. and Field, M.: Evidence from Meteosat imagery of the interaction of sting jets with the boundary layer, *Met. Apps.*, 11, 277–289, <https://doi.org/10.1017/S1350482704001379>, 2004.
- 30 Brâncuş, M., Schultz, D. M., Antonescu, B., Dearden, C., and Ştefan, S.: Origin of Strong Winds in an Explosive Mediterranean Extratropical Cyclone, *Mon. Weather Rev.*, 147, 3649–3671, <https://doi.org/10.1175/MWR-D-19-0009.1>, 2019.
- Clark, P. A., Browning, K. A., and Wang, C.: The sting at the end of the tail: Model diagnostics of fine-scale three-dimensional structure of the cloud head, *Q. J. Roy. Meteorol. Soc.*, 131, 2263–2292, <https://doi.org/10.1256/qj.04.36>, 2005.
- 35 Hewson, T. D. and Neu, U.: Cyclones, windstorms and the IMILAST project, *Tellus A*, 67, 27–128, <https://doi.org/10.3402/tellusa.v67.27128>, 2015.
- Martínez-Alvarado, O., Baker, L. H., Gray, S. L., Methven, J., and Plant, R. S.: Distinguishing the Cold Conveyor Belt and Sting Jet Airstreams in an Intense Extratropical Cyclone, *Mon. Weather Rev.*, 142, 2571–2595, <https://doi.org/10.1175/MWR-D-13-00348.1>, 2014.
- 40 Mass, C. and Dotson, B.: Major Extratropical Cyclones of the Northwest United States: Historical Review, Climatology, and Synoptic Environment, *Mon. Weather Rev.*, 138, 2499–2527, <https://doi.org/10.1175/2010MWR3213.1>, 2010.
- Parker, H.: Do sting jet windstorms exist in the North Pacific storm track?, Master's thesis, Department of Meteorology, University of Reading, UK., 2013.
- Volonté, A., Clark, P. A., and Gray, S. L.: The role of mesoscale instabilities in the sting-jet dynamics of windstorm Tini, *Q. J. Roy. Meteorol. Soc.*, 144, 877–899, <https://doi.org/10.1002/QJ.3264>, 2018.
- 45 Volonté, A., Gray, S. L., Clark, P. A., Martínez-Alvarado, O., and Ackerley, D.: Strong surface winds in Storm Eunice. Part 1: storm overview and indications of sting jet activity from observations and model data, *Weather*, 79, 40–45, <https://doi.org/10.1002/WEA.4402>, 2023a.
- Volonté, A., Gray, S. L., Clark, P. A., Martínez-Alvarado, O., and Ackerley, D.: Strong surface winds in Storm Eunice. Part 2: airstream analysis, *Weather*, 79, 54–59, <https://doi.org/10.1002/WEA.4401>, 2023b.
